# Supplementary material for: Understanding the role of rare-earth metal doping on the electronic structure and optical characteristics of ZnO
Source: Royal Society of Chemistry journal article supplement (doi:10.1039/d2me00093h), 2022-01-01
Supplement: d2me00093h1.pdf [file d2me00093h1.pdf]

## Understanding the Role of Rare-Earth Metals Doping on the Electronic Structure and Optical Characteristics of ZnO

Md. Habibur Rahman<sup>1#\*</sup>, Md. Zahidur Rahaman<sup>2,3#\*</sup>, Emdadul Haque Chowdhury<sup>4</sup>, Mohammad Motalab<sup>1\*</sup>, A. K. M. Akhter Hossain<sup>3</sup>, Md Roknuzzaman<sup>5,6\*</sup>

<sup>1</sup>Department of Mechanical Engineering, Bangladesh University of Engineering and Technology, Dhaka 1000, Bangladesh

<sup>2</sup>School of Materials Science and Engineering, Faculty of Science, University of New South Wales, Sydney 2052, Australia

<sup>3</sup>Department of Physics, Bangladesh University of Engineering and Technology, Dhaka 1000, Bangladesh

<sup>4</sup>Department of Mechanical Engineering, Pennsylvania State University, University Park, PA 16802, USA

<sup>5</sup>School of Chemistry, The University of Sydney, Sydney, NSW 2006, Australia.

<sup>6</sup>School of Physics, University of New South Wales, Sydney, NSW 2052, Australia.

\*Corresponding authors: [roknphy@gmail.com](mailto:roknphy@gmail.com) (Md Roknuzzaman) [abdulmotalab@me.buet.ac.bd](mailto:abdulmotalab@me.buet.ac.bd) (Mohammad Motalab) [imd.habiburrahman@gmail.com](mailto:imd.habiburrahman@gmail.com) (Md. Habibur Rahman)

### Supporting Information

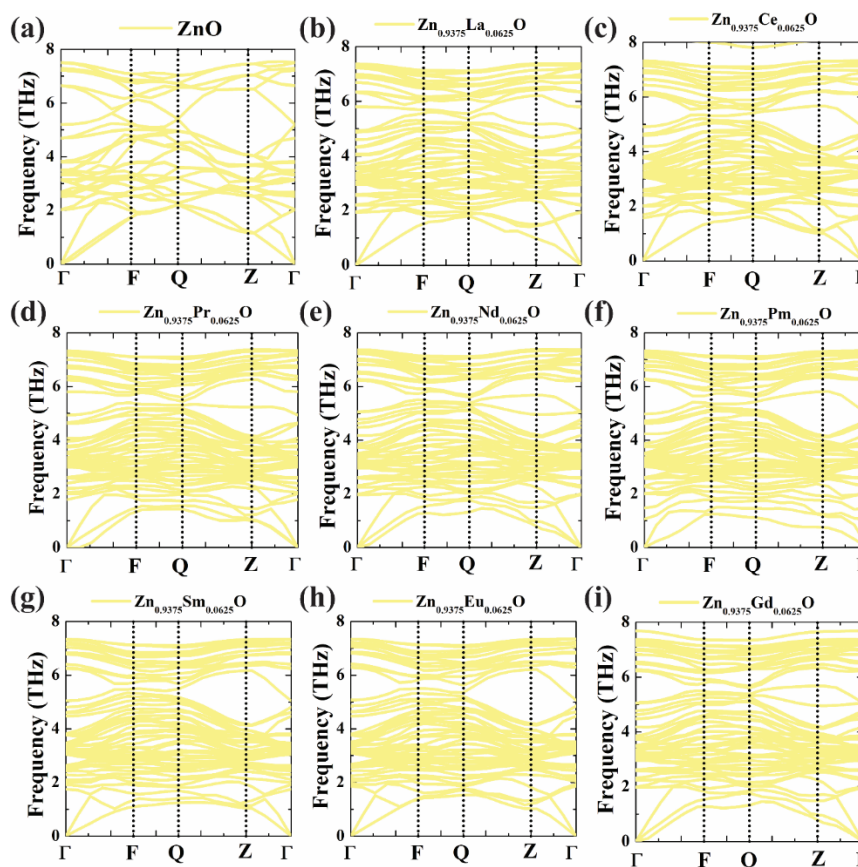

Figure S1. Phonon dispersion relation along the high symmetry Brillouin zone of (a) pure ZnO, (b)  $\text{Zn}_{1-x}\text{La}_x\text{O}$  (c)  $\text{Zn}_{1-x}\text{CeO}$  (d)  $\text{Zn}_{1-x}\text{Pr}_x\text{O}$  (e)  $\text{Zn}_{1-x}\text{Nd}_x\text{O}$  (f)  $\text{Zn}_{1-x}\text{Pm}_x\text{O}$  (g)  $\text{Zn}_{1-x}\text{Sm}_x\text{O}$  (h)  $\text{Zn}_{1-x}\text{Eu}_x\text{O}$  and (i)  $\text{Zn}_{1-x}\text{Gd}_x\text{O}$ .

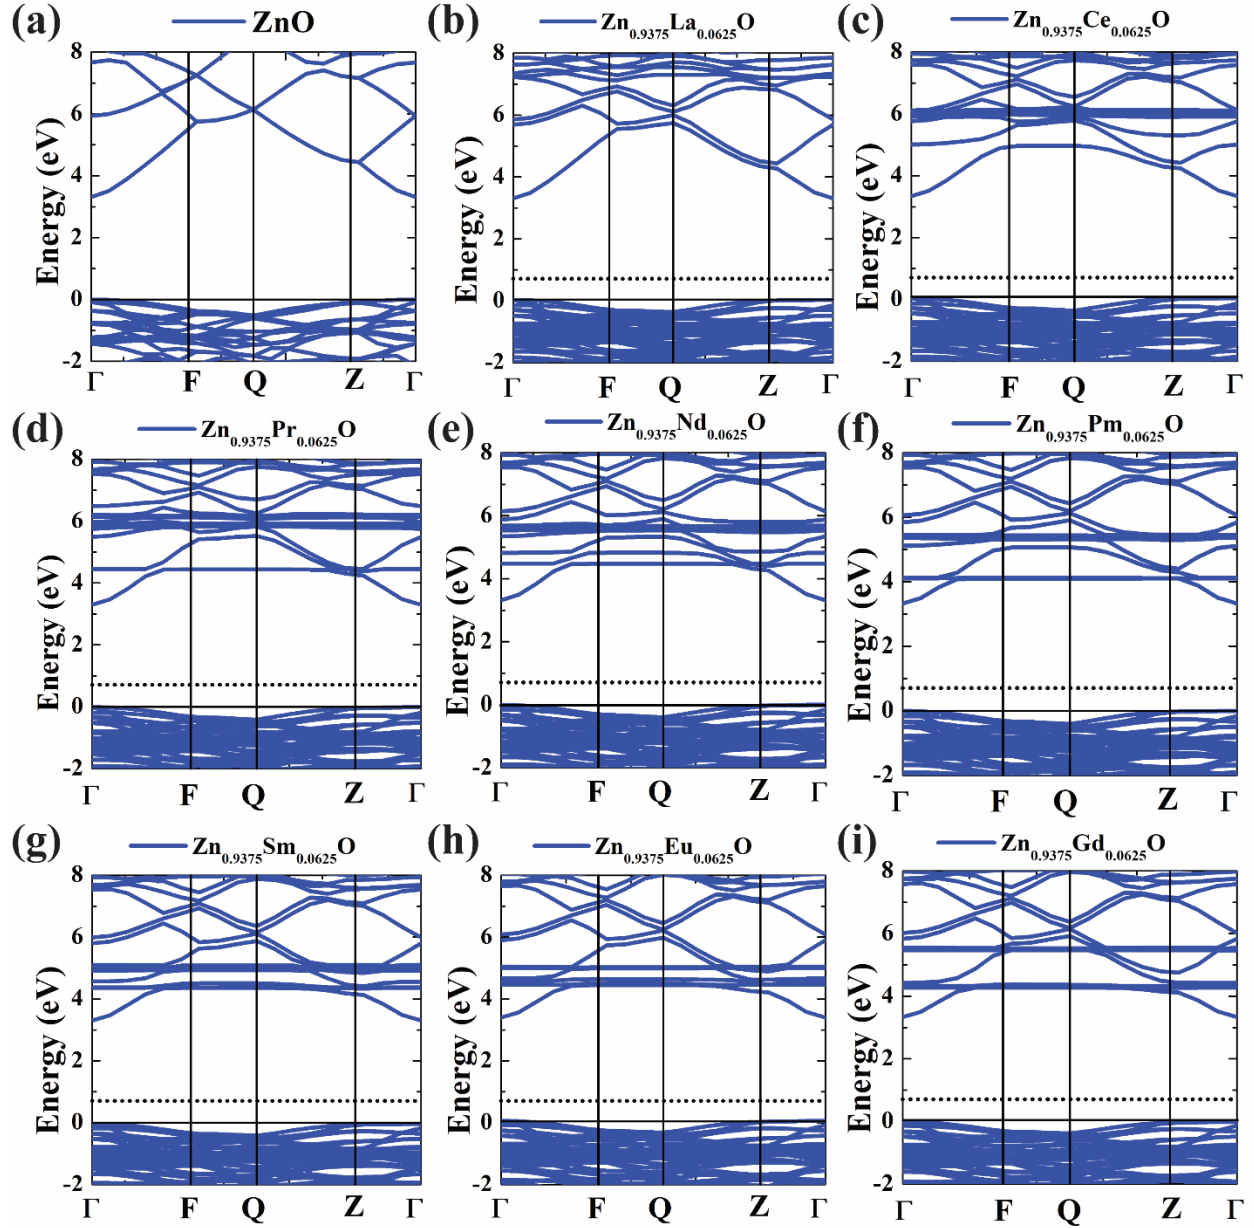

Figure S2. Electronic band structure from GGA+U calculations of (a) pure ZnO, (b)  $\text{Zn}_{1-x}\text{La}_x\text{O}$  (c)  $\text{Zn}_{1-x}\text{CeO}$  (d)  $\text{Zn}_{1-x}\text{Pr}_x\text{O}$  (e)  $\text{Zn}_{1-x}\text{Nd}_x\text{O}$  (f)  $\text{Zn}_{1-x}\text{Pm}_x\text{O}$  (g)  $\text{Zn}_{1-x}\text{Sm}_x\text{O}$  (h)  $\text{Zn}_{1-x}\text{Eu}_x\text{O}$  and (i)  $\text{Zn}_{1-x}\text{Gd}_x\text{O}$ . CBM of bulk ZnO is noted by the black dotted line.

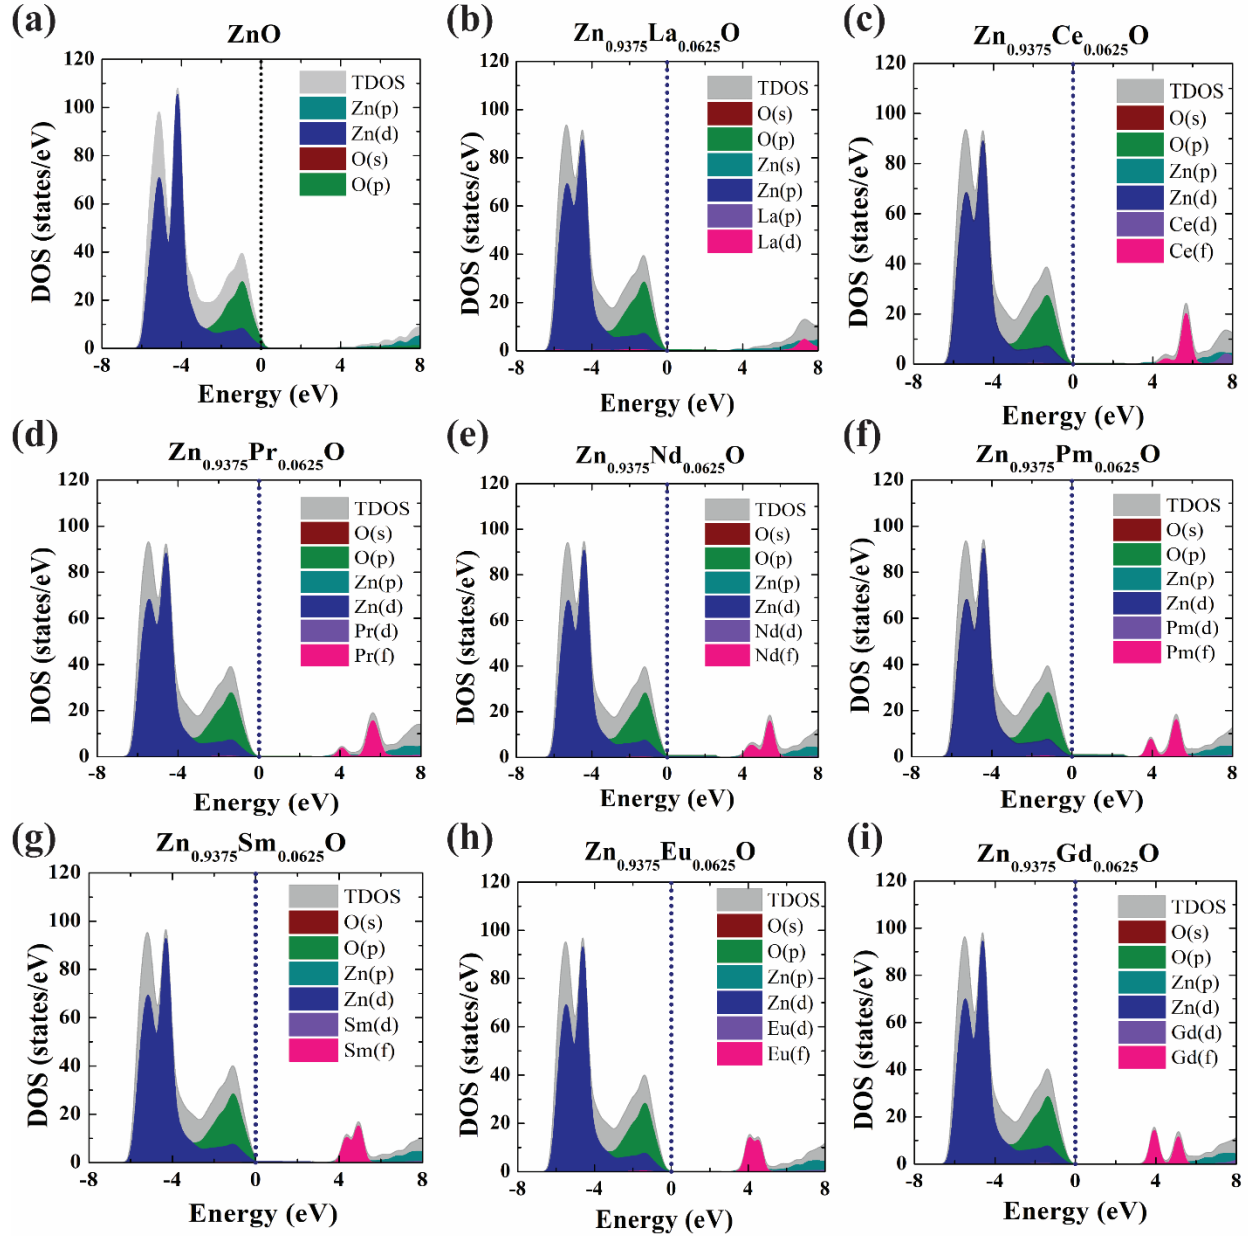

Figure S3. Electronic density of states from GGA+U calculations of (a) pure ZnO, (b)  $\text{Zn}_{1-x}\text{La}_x\text{O}$  (c)  $\text{Zn}_{1-x}\text{CeO}$  (d)  $\text{Zn}_{1-x}\text{Pr}_x\text{O}$  (e)  $\text{Zn}_{1-x}\text{Nd}_x\text{O}$  (f)  $\text{Zn}_{1-x}\text{Pm}_x\text{O}$  (g)  $\text{Zn}_{1-x}\text{Sm}_x\text{O}$  (h)  $\text{Zn}_{1-x}\text{Eu}_x\text{O}$  and (i)  $\text{Zn}_{1-x}\text{Gd}_x\text{O}$ .

### Optimized geometries in CIF format

Optimized geometries of RE doped ZnO using GGA theory have been added to the following GitHub repository <https://github.com/mshabibur/The-Role-of-Rare-Earth-Metals-Doping-on-the-Electronic-Structure-and-Optical-Characteristics-of-ZnO>
